# Supplementary material
Source: PubMed Central journal article supplement (PMC3876254)
Supplement: 1314124110_pnas.201314124SI.pdf [file 1314124110_pnas.201314124SI.pdf]

# Supporting Information

Ebi et al. 10.1073/pnas.1314124110

## SI Materials and Methods

**Cell Lines and Reagents.** BT474, EFM-192A, HCC1419, AU565, T47D, MCF7, MDA-MB-453, BT-20, and CAL-51 cells were cultured in DMEM (Cellgro; Mediatech Inc.) with 10% (vol/vol) FBS. MDA-MB-361 cells were cultured in RPMI 1640 (Cellgro; Mediatech Inc.) with 5% (vol/vol) FBS. Cell lines were obtained from the Center for Molecular Therapeutics at Massachusetts General Hospital Cancer Center. The mutation status was obtained from the Wellcome Trust Sanger Institute Cancer Genome Project Web site ([www.sanger.ac.uk](http://www.sanger.ac.uk)). The following drugs were used: GDC-0941 (supplied by the Targeting PI3K in Women's Cancers Stand Up to Cancer Dream Team), AKT-1/2 inhibitor (Sigma), and MK-2206 (Selleck Chemicals). Compounds were dissolved in DMSO to a final concentration of 10 mmol/L and stored at  $-20^{\circ}\text{C}$ . BYL719 and BKM120 were kindly provided by Novartis and also stored at a final concentration of 10 mmol/L at  $-20^{\circ}\text{C}$ .

**Lentiviral shRNA Experiments.** The tet-inducible shRNA vector used in this study was kindly provided by Novartis. The sequence encoded by inducible shP-Rex1 is cctatgaaccacagcttaca. Lentiviral preparation and infections were performed as previously described (1). shRNA transduced cell lines were grown in each medium supplemented with 10% (vol/vol) Tet-approved FBS (Clontech) in the presence of 2  $\mu\text{g}/\text{mL}$  puromycin. In the tet-inducible system, expression of shRNA was induced by growing cells in the presence of 10 ng/mL doxycycline (Sigma).

**siRNA Knockdown.** Cells were seeded into six-well plates at a density of  $1.5 \times 10^5$  cells per well. Twenty-four hours later, cells were transfected with ON-TARGETplus SMARTpool siRNA against p-21 activated protein 1 (PAK1), p-21 activated protein 2 (PAK2), p-21 activated protein 3 (PAK3), small GTPase K-RAS

(K-RAS), small GTPase H-RAS (H-RAS) or phosphatidylinositol 3,4,5-trisphosphate-dependent Rac exchanger 1 (P-Rex1) (Dharmacon) or Silencer negative control #1 siRNA (Ambion) using Lipofectamine RNAiMAX (Invitrogen) according to the manufacturer's instructions. Transfected cells were cultured at  $37^{\circ}\text{C}$  for 72 h before analysis.

**Apoptosis Analysis.** Cells were treated with media with or without indicated drugs. After 72 h, media was collected. Cells were washed with PBS and trypsinized. PBS wash and trypsinized cells were added to the collected media in a single tube. Cells were pelleted, washed once with PBS, and resuspended in annexin binding buffer (BD Biosciences). Cells were stained with propidium iodide (BD Biosciences) and annexin V Cy5 (Biovision) according to the manufacturer's protocol and assayed on an LSRII flow cytometer (BD Biosciences).

**RNA Extraction and Quantitative RT-PCR.** For cell lines, RNA was isolated and purified using the Qiagen RNeasy Mini kit and further purified by DNase treatment with Ambion Turbo DNase. After extraction and purification, RNA was reverse transcribed and amplified using superscript first-strand cDNA synthesis (Invitrogen). The amplicon abundance of PAK3 and  $\beta$ -actin was monitored in real time on a Roche Lightcycler 480 (Roche Diagnostics) by measuring the fluorescence increases of SYBR Green. The PAK3 primers used in this study were: forward, 5'-AGTCAGAAGTTCAGTTCGCC-3', reverse, 5'-CATGATGG-AGTTGAAGGTAGTTTCGT-3'. The  $\beta$ -actin primers were: forward, 5'-CTGTGCTATCCCTGTACGCCCTC-3' and reverse, 5'-CATGATGGAGTTGAAGGTAGTTTCGT-3'. Relative PAK3 RNA levels were calculated using the  $\Delta\text{-}\Delta$  threshold cycle ( $C_t$ ) method as previously described.

1. Rothenberg SM, et al. (2008) Modeling oncogene addiction using RNA interference. *Proc Natl Acad Sci USA* 105(34):12480–12484.

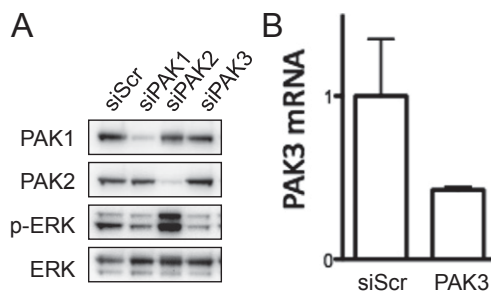

**Fig. S1.** PAK1 and PAK3 regulate ERK activity. T47D cells were transfected with control, PAK1, PAK2, or PAK3-targeted siRNA for 72 h. (A) Cell lysates were probed with the indicated antibodies. Independent experiments were performed at least four times, and a representative result is shown. (B) PAK3 mRNA was quantified by quantitative PCR (because PAK3 protein was not detectable using available antibody). The average  $\pm$  SD of two independent experiments is shown.
